1 **Migratory birds are able to choose the appropriate migratory direction under dim yellow**  
2 **monochromatic light**

3  
4  
5 Nadezhda Romanova<sup>1</sup>, Gleb Utvenko<sup>2</sup>, Anisia Prokshina<sup>3</sup>, Fyodor Cellarius<sup>3</sup>, Aleksandra  
6 Fedorischeva<sup>3</sup>, Alexander Pakhomov<sup>4\*</sup>

7  
8 <sup>1</sup>Moscow State Pedagogical University, 1/1 M. Pirogovskaya St., Moscow 119991, Russia

9 <sup>2</sup>Department of Vertebrate Zoology, St. Petersburg State University, 199034 St. Petersburg, Russia

10 <sup>3</sup>Department of Vertebrate Zoology, Lomonosov Moscow State University, 119234 Moscow,  
11 Russia

12 <sup>4</sup>Biological Station Rybachy, Zoological Institute RAS, Rybachy 238535, Kaliningrad  
13 Region, Russia

14  
15  
16  
17 \*correspondence author (sasha\_p.bio@mail.ru)

18  
19  
20  
21  
22  
23  
24  
25  
26  
27  
28  
29  
30 keywords: avian magnetoreception, pied flycatcher, the magnetic compass, monochromatic light,  
31 bird migration

32 **Abstract**

33           Previously it has been shown that migratory birds were oriented in the appropriate  
34 migratory direction under UV, blue and green monochromatic lights (short-wavelength) and were  
35 unable to use their magnetic compass in total darkness and under yellow and red lights (long-  
36 wavelength). Currently, it is generally assumed that the magnetic compass of birds works correctly  
37 only under short-wavelength light. However, at the same time, there is an assumption that the  
38 magnetic compass has two sensitivity peaks: in the short and long wavelengths but with different  
39 intensities. In this project, we aimed to study the orientation of long-distance migrants, pied  
40 flycatchers (*Ficedula hypoleuca*), in different monochromatic lights during autumn migration. The  
41 birds were tested in the natural magnetic field (NMF) and 120° CCW shifted magnetic field (CMF)  
42 under green and yellow light (intensity 1 mW m<sup>-2</sup>). All tests were performed in a specially  
43 constructed wooden laboratory equipped with magnetic coils to manipulate the magnetic field. We  
44 showed (1) pied flycatchers were completely disoriented under green light both in the NMF and  
45 CMF and (2) for the first time they showed the migratory direction in NMF and appropriate  
46 response to CMF under yellow light. Our data suggest that the avian magnetic compass might be  
47 based on two different mechanisms: a high-sensitive short-wavelength mechanism and a low-  
48 sensitive mechanism in the long-wavelength spectrum.

49  
50  
51  
52  
53  
54  
55  
56  
57  
58  
59  
60  
61  
62  
63  
64  
65  
66

## 67 **Introduction**

68           Currently, it is well known that migratory birds can detect the Earth's magnetic field and  
69 use it as a cue source for orientation and navigation [1,2]. Even though the ability of birds to use  
70 information from the magnetic field for orientation was first described in the 1960s [3], the  
71 sensory, physiological and biophysical mechanisms of this compass system have still remained  
72 unexplored. One of the most popular theories, the radical pair model (RPM), proposed for the first  
73 time by Klaus Schulten [4] and lately upgraded by Thorsten Ritz [5], assumes that animals have  
74 specialized magnetosensitive photoreceptors in the retina of the eye. According to this theory, the  
75 animal can perceive magnetic compass information through a process of light-dependent radical  
76 pair in cryptochromes, light-sensitive proteins present in all cells of the animal's body and only  
77 know vertebrate photopigments that can form long-lived, spin-correlated radical pairs upon light  
78 absorption [5,6].

79           The avian magnetic compass has two main key features, which correspond to the RPM: the  
80 light dependence and the sensitivity to weak oscillating magnetic fields (OMFs) in the  
81 radiofrequency range. The initial radical pair theory predicts that an oscillating magnetic field in  
82 the lower megahertz range (1–100 MHz) can disrupt the magnetic compass due to the electron  
83 paramagnetic resonance effect [5,7]. Disruption of magnetic orientation in the presence of OMFs  
84 has been suggested as a diagnostic tool for the radical pair reaction mechanism underlying the  
85 magnetic compass in different animal taxa [8–10], but see [11]. This effect of OMFs was  
86 experimentally observed in various studies performed by independent scientific groups in  
87 migratory [12–16] and non-migratory birds [17,18]. However, it should be noted that this model  
88 cannot fully explain the results of behavioural studies: 1) the sensitivity thresholds of the magnetic  
89 compass to OMFs in European robins and garden warblers are two orders of magnitude lower than  
90 what the mainstream theory predicts [19–22]; 2) there is no consensus among researchers whether  
91 the magnetic compass orientation of birds can be disrupted by both narrow-band (at the Larmor  
92 frequency) and broadband electromagnetic fields or only by broadband electromagnetic noise  
93 [14,15]; 3) a recent study showed the insensitivity of the avian magnetic compass to OMFs applied  
94 locally to the eyes [22].

95           Magnetic compass orientation in birds (migratory and non-migratory) and several species  
96 of other animal taxa (butterflies, newts, frogs, beetles, and fruit flies) has been shown to be light-  
97 dependent [17,23–30]. Results of various behavioural studies indicate that both the spectrum  
98 wavelength and light intensity play a crucial role in the ability of migratory birds to orient using  
99 information from the Earth's magnetic field. Garden warblers *Sylvia borin*, Australian silvereyes  
100 *Zosterops lateralis* and European robins *Erithacus rubecula* are able to choose the appropriate  
101 migratory direction in orientation cages under full-spectrum ('white') light and different types of

102 monochromatic light from UV to green light (short-wavelength light, 373 - 565 nm) and show  
103 disorientation or a shifted response under long-wavelength light (from yellow to red, 590 - 645  
104 nm) or total darkness [23,31,40–46,32–39] (for more details about response of tested birds to  
105 different parameters of monochromatic light in behavioural studies, see Table S1). The intensity  
106 (irradiance  $\text{mW/m}^2$  and photon quantity) is the next crucial characteristic of light that affects the  
107 magnetic orientation of birds. It has been shown that high light intensity interferes with the ability  
108 to use properly the magnetic compass for orientation: birds were able to choose the appropriate  
109 migratory direction when tested under low-intensity UV ( $0.3 \text{ mW m}^{-2}$ ,  $0.8 \times 10^{15} \text{ quanta s}^{-1} \text{ m}^{-2}$ ;  
110 [46]), turquoise ( $2.1 - 2.2 \text{ mW m}^{-2}$ ,  $7 - 8 \times 10^{15} \text{ quanta s}^{-1} \text{ m}^{-2}$ ; [38,43,47]), blue ( $2.4 - 2.8 \text{ mW m}^{-2}$ ,  
111  $8 - 8.7 \times 10^{15} \text{ quanta s}^{-1} \text{ m}^{-2}$ ; [33,38,40,46,47]) and green ( $0.2 - 3 \text{ mW m}^{-2}$ ,  $6 - 8.7 \times 10^{15} \text{ quanta s}^{-1} \text{ m}^{-2}$ ;  
112 [22,23,32–36,42,47]) monochromatic light. If the light intensity inside orientation cages was  
113 increased (by 2-5 times or more, depending on the spectrum of light), birds were disoriented or  
114 showed an axial response (for details, see Table S1).

115 However, the relation between the avian magnetic compass and the parameters of light is  
116 more complicated than we can see above. In the absence of light ('total darkness'), birds are active  
117 and able to orient but in a direction that does not correspond with the population-specific migratory  
118 direction and is independent of the migratory seasons (the same one in autumn and spring; [44,45]).  
119 According to the authors of this study, birds do not have the opportunity to use the light-dependent  
120 inclination magnetic compass under such light conditions and show a so-called 'fixed direction'  
121 response [44]. It is based on a magnetite-based magnetic polarity sense: 1) birds altered their  
122 headings accordingly when tested in the magnetic field with the horizontal component reversed  
123 and do not react to the inversion of the vertical component; 2) OMFs had no disruptive effect on  
124 such behaviour of birds in orientation cages; 3) "fixed direction" responses are disrupted when the  
125 birds' beaks are treated with a local anaesthetic Xylocaine (lidocaine) which can deactivate  
126 putative magnetite-based magnetoreceptor in the upper beak ([2,48] but see [49]). The 1 hour pre-  
127 exposure to a light condition other than full-spectrum light (total darkness and green light) affects  
128 the orientation behaviour of the tested birds and leads to disorientation or axial response when the  
129 birds are tested in green light, in contrast to blue or turquoise light ([47], but see [42]).

130 Adding dim yellow (590 nm,  $2.0 \text{ mW m}^{-2}$ ) to blue (424 nm,  $2.8 \text{ mW m}^{-2}$ ) or green (565  
131 nm,  $2.1 \text{ mW m}^{-2}$ ) light results in an unusual behaviour of birds in orientation tests: they show  
132 direction which does not correspond to the normal seasonal migratory direction and differ between  
133 seasons [41], similar to orientation in total darkness. The authors of this study suggested that  
134 changes in orientation of birds under blue-yellow and green-yellow light were caused by  
135 interaction between two different receptors (short-wavelength and long-wavelength). Previously,  
136 a similar idea was proposed in another research carried out by Swedish scientists during autumn

137 migration: European robins were oriented west-northwest under low-intensity red light ( $1\text{mW m}^{-2}$ ,  $3.2 \times 10^{15}$  quanta  $\text{s}^{-1} \text{m}^{-2}$ ;  $5\text{mW m}^{-2}$ ,  $16 \times 10^{15}$  quanta  $\text{s}^{-1} \text{m}^{-2}$ ), while at high intensity ( $10\text{mW m}^{-2}$ ,  $32 \times 10^{15}$  quanta  $\text{s}^{-1} \text{m}^{-2}$ ) they were disoriented [39]. It allows us to assume that birds might have a light-dependent magnetoreception system based on two spectral mechanisms: a highly sensitive short-wavelength mechanism in the blue-green spectrum and a low-sensitive long-wavelength mechanism in the red spectrum. The existence of a similar system was observed in red-spotted newts *Notophthalmus viridescens*: they exhibited shoreward (normal) magnetic orientation under full spectrum light/ 450 nm light and  $90^\circ$  counterclockwise shifted orientation under light with wavelengths  $> 500$  nm [25,50]. However, independent replication of this study in European robins and Australian silvereyes did not confirm these findings [45]: both species were oriented in a similar direction under dim red light ( $1\text{mW m}^{-2}$ ) as robins in the previous study, but this direction did not differ significantly between migratory seasons (spring and autumn) and light conditions (red light and total darkness). All of these indicate that it might be a ‘fixed direction response discovered previously by the same scientific group [40,44].

151 Despite all the exceptions mentioned above, currently, it is generally accepted that birds can orient using information from the geomagnetic field only under short-wavelength light (from UV to green) and lose this ability in long-wavelength light (yellow and red). On the other hand, it is difficult to fully ignore the fact that orientation in long-wavelength light might be possible according to the results of behavioural studies in birds and other species that have not yet been fully explained [25,26,39,50,51]. In the present study, we aimed to investigate magnetic compass orientation in a new model species, long-distance migrant pied flycatcher *Ficedula hypoleuca*, under dim green and yellow light, which are on the “threshold” between the short-wavelength and long-wavelength light.

160

## 161 **Materials and methods**

### 162 **Study site, model species and bird keeping**

163 The capture of birds and experiments were carried out in the vicinity of the Biological Station Rybachy on the Curonian Spit (Kaliningrad Region, Russia;  $55^\circ 09' \text{N}$ ,  $20^\circ 52' \text{E}$ ) in August-September 2021-2022. As a model species, we used first-year pied flycatchers (male and female), common migrants, and a new object to study light-dependent magnetoreception in migratory birds. After capture by mist-nets, birds were placed in a laboratory aviary without access to any astronomical cues (stars and the sun) under an artificial photoperiod that corresponded to the natural one and was controlled by an IoT dimmer Shelly Pro 1 (Allterco Robotics, Bulgaria). Each bird was kept in a separate compartment of a cage ( $40 \times 40 \times 40$  cm) and fed mealworms, mixed diet (eggs, carrot, breadcrumbs), and Padovan complete feed for insect-eating birds + a vitamin

172 supplement in pure water *ad libitum*. Fat score and weight of each bird were estimated every day  
173 for 3-4 days after trapping. If these parameters (fat and weight) constantly decreased for two days  
174 (which indicates a too high level of stress), we released these birds into the wild. The indoor aviary  
175 was equipped with IP cameras with infrared LEDs (840 nm) so that we could monitor the activity  
176 and behaviour of the birds in their cages in real time at night. For experiments, we selected only  
177 birds which exhibited migratory restlessness on a given night.

178 All animal procedures (the capture of the birds and simple, non-invasive, behavioural  
179 experiments) were approved by the appropriate authorities: Permit 24/2018-06 by Kaliningrad  
180 Regional Agency for Protection, Reproduction and Use of Animal World and Forests; and Permit  
181 2020-12 by Ethics Committee for Animal Research of the Scientific Council (Zoological Institute,  
182 Russian Academy of Sciences). All birds were released at the end of all tests well before the  
183 migration of their conspecifics finished.

184

### 185 **Experimental setup and test conditions**

186 Before each test, the birds were kept in total darkness for at least an hour to avoid the  
187 cumulative effect in cryptochromes. According to the previous study, birds can use products of the  
188 first step in the redox cycle of FAD that accumulate before the light is turned off. If you then test  
189 birds under artificial light conditions (darkness, monochromatic lights, etc.), it can lead to a false  
190 directional result [52].

191 All birds were randomly tested under different light and magnetic experimental conditions:  
192 1) green light and the natural magnetic field (NMF); 2) green light and a changed magnetic field  
193 (CMF) with magnetic north deflected 120° counterclockwise (120° CCW); 3) yellow light and the  
194 NMF; 4) yellow light and 120° CCW CMF. Experimental magnetic fields were produced by a  
195 double-wrapped, three-dimensional Merritt four-coil system ('magnetic coils' hereafter). This  
196 Merritt coil system generates a field with >99% homogeneity within a space of ca. 110 × 110 ×  
197 110 cm. Each of the three axes of coils was driven by a separate constant current power supply  
198 BOP 50-4M (Kepco Inc., USA) placed along with the coils' control box in a shielded and grounded  
199 box, located about 2 meters from the Merritt coil system. The box reduced the sound of working  
200 power supplies so it was by far below the level of natural environmental noise near the  
201 experimental setup and could not be an audible position cue for tested birds. We did not find any  
202 effect of working power supplies on bird orientation according to the results of our previous studies  
203 in which the same power supply box was used [53–55]. The parameters of the magnetic field were  
204 checked in the centre of the experimental table and opposite corners using a FMV400 portable  
205 magnetometer (Meda Inc., USA) before and after each test night. The average magnetic  
206 measurements over all test days under the NMF condition: intensity  $50463 \pm 104$  nT (mean  $\pm$  sd)

207 and inclination  $70.11^\circ \pm 0.55$ ; under the CMF condition: intensity  $50468 \pm 105$  nT, inclination  
208  $70.21^\circ \pm 0.42^\circ$  and declination (horizontal direction)  $-119.97^\circ \pm 0.11^\circ$ .

209 Behavioural experiments under artificial light conditions took place in a non-magnetic  
210 laboratory chamber specially constructed around the magnetic coils (Figure S1). We used  
211 professional LED strips (Arlight, Russia) as a light source of monochromatic lights (see parameters  
212 and spectrum of LEDs in Figure S2 and Table 1). LED strips were mounted on an aluminium  
213 frame (under the chamber ceiling, Figure S1B) and fed by a Rigol DP711 programmable DC power  
214 supply (Rigol Technologies, Inc., Beaverton, USA) which was placed in the power supply box  
215 (mentioned above). The LI-1500 lightmeter (LI-COR Inc., USA) with a LI-190R terrestrial  
216 quantum sensor was used to measure the level of light intensity (in quanta). Measurements in  
217 irradiance ( $\text{mW m}^{-2}$ ) under monochromatic lights were taken by the P-971-1 optometer (Gigahertz  
218 Optik, Germany) and the probe ‘Visible’ RW-3703-2, a silicon photo element for the wavelength  
219 range 400-800 nm (with specific calibrations for the wavelengths of the LEDs; [52]), in full  
220 spectrum natural light (outside) and ‘total darkness’ (inside) were taken by the LI-1500 lightmeter  
221 with the LI-200R pyranometer sensor. We measured the spectrum of LEDs using the MK350N  
222 PREMIUM handheld spectrometer (UPRtek Inc., Taiwan). All measurements of light intensity  
223 and spectrum have been taken inside the orientation cages under Plexiglass lids, at the level of the  
224 birds’ head.

225 Parallel / before the experiments under monochromatic lights in the laboratory chamber  
226 (see dates of experiments under each experimental condition in Table S1), the birds were tested  
227 under natural light conditions (full-spectrum light) with (autumn season 2021) and without access  
228 to stars (autumn seasons 2021-2022) to make sure that our birds were in migratory condition and  
229 could show species-specific migratory direction in orientation cages. All experiments under  
230 natural light condition were performed outdoors on wooden tables placed in the clearing of reeds  
231 on the coast of the Courish Bay near the laboratory chamber. This experimental place is in a rural  
232 location with low levels of radio-frequency noise according to our previous [14] and recent  
233 measurements of RF performed in 2022 (unpublished data) using a calibrated active loop antenna  
234 FMZB 1512 (Schwarzbeck Mess-Elektronik, Germany) and a spectrum analyzer Rigol DSA815-  
235 TG (Rigol Technologies, USA). In 2022 after the birds were tested under the monochromatic light  
236 condition in the NMF and the CMF, they were tested again under the NMF condition in so-called  
237 “total darkness” (when all light sources inside the laboratory chamber were turned off).

### 238 **Orientation tests and data analysis**

239 All orientation experiments (in full-spectrum and monochromatic lights) started at least 1  
240 hour after local sunset (usually at the beginning of astronomical twilight, when the all tested birds  
241 started to show nocturnal restlessness in cages) and lasted 25-30 min for each experimental

242 condition. We used Emlen funnels (the diameter of the upper part - 34 cm, the lower part - 10 cm,  
243 the height - 14 cm, the angle of the wall- 45°, material – aluminium; [56]) to analyze the direction  
244 of birds' activity under different lights. In all experiments (except tests in full-spectrum light +  
245 stars) on top of Emlen funnels, we put lids made of opaque glass (Plexiglass XT, 3 mm, 70%  
246 transmission) which completely obscured stars and any other patterns (landscapes, magnetic coils,  
247 etc) and diffused light from LEDs. Thus, the only orientation cue available to experimental birds  
248 during the test was the Earth's magnetic field.

249 The directionality of the birds' activity was recorded as scratches left by their claws as they  
250 hopped in the funnels on a print film covered with a dried mixture of whitewash and glue. The  
251 data (each bird's mean direction from the distribution of scratches) were analysed by 3 independent  
252 researchers (2021: N.R., A.F., Dmitry Sannikov; 2022: A.Pr, Dmitry Sannikov, Julia Bojarinova),  
253 who did not know under which magnetic conditions (CMF or NMF) a particular bird was tested.  
254 In most cases, the mean direction could be very precisely identified using the simple visual  
255 estimation method [57]. If a pattern of scratches was not clear, the scratches were counted in each  
256 of 36 10 ° sectors, and we used a custom-written script to assess the directionality based on the  
257 number of scratches. The mean of the directions determined directions was recorded as the  
258 orientation result. If at least two observers considered the scratches to be randomly distributed or  
259 if the two mean directions deviated by more than 30°, the bird was considered to be not oriented  
260 in the given test. If the number of scratches was fewer than 40 scratches, the bird was considered  
261 to be inactive in a given test.

262 For the final analysis, we included the results of the birds tested at least two times with at  
263 least one result significantly oriented according to the Rayleigh test [58] at the 5% significance  
264 level. We performed additional distribution analysis (maximum likelihood analysis) for our  
265 samples using the CircMLE R package, as it was described in [59], to be fully sure that our birds  
266 showed unimodal orientation under different experimental conditions. The nonparametric Mardia-  
267 Watson-Wheeler (MWW test) test was used to test the significance of the difference between the  
268 orientation of pied flycatchers under different conditions. The data used for the final analysis are  
269 accessible in Table S2 in the Supplementary Materials. Circular statistics were performed in  
270 Oriana 4.02 (Kovach Computing Services, UK). Additionally, we used the bootstrap technique  
271 [60] to identify whether significantly oriented groups showed significantly more directed  
272 behaviour than non-statistically significantly oriented groups. According to this method, a random  
273 sample of orientation directions (n angles) was drawn with replacement from the sample of  
274 orientation directions present in the significantly oriented group. Based on these n orientation  
275 angles, the corresponding p-value was calculated, and this procedure was repeated 100 000 times  
276 [13,61]. After that, the resulting 100,000 R-values are ranked in ascending order: the r-values at



277 rank 2500 and 97500, at rank 500 and 99500 define the 95% and 99% limits for the actually  
278 observed r-value of the significantly oriented group, respectively. If the actual observed r-value of  
279 the disoriented group is outside these confidence intervals, the oriented group is significantly more  
280 directed than the disoriented group with a significance of  $p < 0.05$  and  $p < 0.01$ , respectively.  
281 Circular statistics were performed Oriana 4.02 (Kovach Computing Services, UK). Bootstrap and  
282 maximum likelihood analysis were performed in R 4.1.1 [62].

283

## 284 **Results**

285 Under full spectrum (natural) light pied flycatchers showed the seasonal population-  
286 specific migratory direction in southwest without the opportunity to obtain directional information  
287 from astronomical cues (under plexiglass lids, 2021-2022:  $\alpha = 212^\circ$ ,  $n = 28$ ,  $r = 0.491$ ,  $p <$   
288  $0.001$ , 95% CI= $183^\circ$ - $241^\circ$ , Fig. 1A) and with access to stars (2021:  $\alpha = 212^\circ$ ,  $n = 18$ ,  $r = 0.643$ ,  $p <$   
289  $0.001$ , 95% CI= $187^\circ$ - $237^\circ$ , Fig. 1B). The mean direction of birds obtained in the control tests  
290 under natural light was similar to the mean autumn migratory direction of the same species on the  
291 Curonian Spit according to ringing data [63] and previous laboratory and field studies [53,64].

292 Experiments in monochromatic green light showed that the birds could not determine the  
293 migratory direction in the natural ( $\alpha = 115^\circ$ ,  $n = 10$ ,  $r = 0.199$ ,  $p = 0.68$ ; Figure 2A) and  $120^\circ$  CCW  
294 rotated magnetic fields ( $\alpha = 238^\circ$ ,  $n = 12$ ,  $r = 0.168$ ,  $p = 0.72$ ; Figure 2B). Results of the bootstrap  
295 analysis indicate that orientation results under green light conditions were significantly more  
296 random than in NMF under yellow light in 2021 (NMF\_yellow\_2021 - NMF\_green\_2021:  $p <$   
297  $0.01$ ; 95% CI for r-value is  $0.48 < r < 0.86$ ; 99% CI for r-value is  $0.44 < r < 0.94$ , Fig S3A) and in  
298 CMF under yellow light (CMF\_yellow\_2022 - CMF\_green\_2022:  $p < 0.01$ ; 95% CI for r-value is  
299  $0.42 < r < 0.93$ ; 99% CI for r-value is  $0.38 < r < 0.94$ , Fig S3B).

300 Surprisingly, under monochromatic yellow light, the birds showed the seasonally expected  
301 migratory direction under NMF condition ( $\alpha = 195^\circ$ ,  $n = 26$ ,  $r = 0.7$ ,  $p < 0.001$ , 95% CI =  $177^\circ$  -  
302  $214^\circ$ , Figure 2C). The orientation under this experimental condition was not significantly different  
303 from the orientation of the same birds in similar magnetic condition under natural full-spectrum  
304 light (the MWW test:  $W = 1.94$ ,  $p = 0.38$  and both 95 and 99% confidence intervals of these  
305 distributions overlap: 99% CI in natural light:  $174^\circ - 250^\circ$ , 99% CI in yellow light:  $171^\circ - 220^\circ$ ).  
306 When we turn the horizontal component of the magnetic field by  $120^\circ$  counterclockwise, pied  
307 flycatchers apparently responded to such magnetic field manipulation ( $\alpha = 57^\circ$ ,  $n = 28$ ,  $r = 0.5$ ,  $p <$   
308  $0.001$ , 95% CI =  $29 - 85$ , Figure 2D). The orientation of pied flycatchers under the CMF  
309 condition under yellow light was significantly different from the orientation of the same birds in  
310 NMF both under yellow and full spectrum light (the MWW test:  $W = 31.2$ ,  $p \ll 0.001$  and  $W =$   
311  $25.4$ ,  $p \ll 0.001$ , respectively), their 95 and 99% do not overlap (99% CI in CMF yellow light:

312 20° – 93°) and both confidence intervals (95 and 99%) under the CMF yellow light condition  
313 include the expected 120° CCW rotation relative to mean direction in the NMF ( $\alpha = 75^\circ$ ).  
314 According to the results of the maximum likelihood analysis, birds showed unimodal orientation  
315 under the majority of experimental conditions (Table S3), with the exception in total darkness,  
316 where a bimodal alternative is suggested, probably due to a small sample size.

317

## 318 **Discussion**

319 Experimental data obtained in this project clearly show that long-distance songbird  
320 migrants, pied flycatchers, are not able to use their magnetic compass under low-intensity green  
321 monochromatic light. These results contradict the generally accepted conclusion that light-  
322 dependent magnetoreception in migratory birds takes place only under full-spectrum or  
323 monochromatic light from UV to green [65,66]. In our experiments, we used green LEDs with a  
324 peak wavelength of 530 nm which was in the middle between turquoise (502-510 nm) and green  
325 (560-571 nm) light used in previous studies [23,38,39,43]. However, as it has been mentioned in  
326 Methods, the birds were transported (in opaque textile bags) from the windowless aviary to the  
327 temporary wooden house (on the experimental site) at least 1 hour after the lights in the aviary  
328 were turned off. Under this condition, they did not have the opportunity to use the products of the  
329 first stage in the redox cycle of FAD that accumulated under full-spectrum or UV/blue light,  
330 according to the theory proposed by Wiltschko's lab [47,52]. Flavin adenine dinucleotide (FAD)  
331 is the light-absorbing cofactor of cryptochromes (its 'light antenna') and exists in three different  
332 redox states with different absorption spectra ( $FAD_{ox}$ ,  $FADH^\cdot$  and  $FADH^-$ ). During the first stage  
333 of the redox cycle, the fully oxidised state,  $FAD_{ox}$ , reduces to the neutral semiquinone radical  
334  $FADH^\cdot$  after absorption of full-spectrum or monochromatic light with wavelengths from UV to  
335 blue (peaks of absorption at 360 and 470 nm) [66,67].  $FADH^\cdot$ , which forms a magnetic sensitive  
336 radical pair with a tryptophan radical [68], can be further light-independently reoxidised to  $FAD_{ox}$   
337 or photoreduced by UV - green light (peaks of absorption at 495 and 580 nm) to  $FADH^-$ , which is  
338 then reoxidised to  $FAD_{ox}$  without light [17,66,67]. Green light itself cannot photoreduce  $FAD_{ox}$   
339 and start this redox cycle, but the magnetic orientation of birds under this spectrum is possible, as  
340 the results of various behaviour studies prove, but only for less than 1 hour. Birds lost their ability  
341 to use the magnetic compass in orientation experiments under green light condition after 1 hour of  
342 pre-exposure to total darkness/green light or 1 hour of testing in green light, in contrast to blue or  
343 turquoise light [47]. Our results of experiments in monochromatic green light with another peak  
344 wavelength (530 nm vs 565 nm) independently confirm this suggestion: under this light condition  
345 accumulated supply of  $FADH^\cdot$  enables the second part of the redox cycle to run further to  $FADH^-$   
346 and then to  $FAD_{ox}$  only if birds are tested immediately/shortly after the lights in an indoor aviary

347 are turned off [31,38] or birds are kept in an outdoor aviary under full-spectrum natural light before  
348 tests [22,69]. The intensity of green light in our experiments was at least two times lower than in  
349 the majority of prior studies performed in different species ([35,42,45,47]; see Table S1 for details)  
350 and it can explain disorientation of pied flycatchers. However, the results of some other studies  
351 indicate that European robins and garden warblers were able to choose the appropriate migratory  
352 direction under the same or even lower intensity of green light (1 and 0.2-0.3 mW m<sup>-2</sup>; [22,36,39]).

353 In contradiction to our assumptions and the theory mentioned above, pied flycatchers were  
354 oriented under dim yellow light towards southwest in the natural magnetic field. The southwesterly  
355 direction corresponds to the expected migratory direction, which is typical for pied flycatchers  
356 from the eastern Baltic [53,64,70]. It should be noted that the same birds showed similar direction  
357 under different experimental conditions: full-spectrum natural light under stars/without them (Fig.  
358 1 A, B) and low-intensity yellow light with access only to the magnetic field as a cue source (Fig.  
359 2C). Along with highly expressed nocturnal restlessness before tests, these findings allow us to  
360 assume that our birds exhibited true migratory behaviour in all mentioned cases and use the  
361 magnetic field as a compass cue source in the absence of astronomical cues. Additionally, pied  
362 flycatchers properly responded to the deflection of the horizontal component of the magnetic field  
363 (120° counterclockwise) and changed their orientation from southwest to northeast. All of this  
364 strongly indicates for the first time that pied flycatchers are able to choose migratory direction  
365 under dim yellow light using only the magnetic compass.

366 This finding is not in the line with orientation experiments in songbird migrants (garden  
367 warblers and European robins) conducted under 590 nm yellow (2.9 mW m<sup>-2</sup> or 7 - 43x10<sup>15</sup> quanta  
368 s<sup>-1</sup> m<sup>-2</sup>) or 567.5 nm green-yellow (1 and 5 mW m<sup>-2</sup> or 2.9 and 14x10<sup>15</sup> quanta s<sup>-1</sup> m<sup>-2</sup>) and resulted  
369 in disorientation [33,35,38,69]. There might be two explanations for these contradictive results:

370 1) Orientation of pied flycatchers under monochromatic yellow light is not true magnetic  
371 compass orientation but a ‘fixed direction’ response, previously shown in ‘total  
372 darkness’ or dim red light with the same intensity (1 mW m<sup>-2</sup>; [44,45]). We might  
373 completely exclude the possibility that the birds showed such type of behaviour under  
374 dim yellow light in our autumn experiments only if they would be tested again in the  
375 magnetic field with an inverted vertical component or during spring migration and  
376 reverse their headings or show the seasonally appropriate migratory direction in spring,  
377 respectively. Both European robins and Australian silvereyes showed similar west-  
378 northwesterly direction regardless of the migratory season under different light  
379 conditions: total darkness, dim red light (1 mW m<sup>-2</sup>) and high-intensity green light (15  
380 mW m<sup>-2</sup> or 43x10<sup>15</sup> quanta s<sup>-1</sup> m<sup>-2</sup>; [34,36,40,44,45]). Therefore, the ‘fixed direction’  
381 response is characterized by the same directional tendencies not only in spring and

382 autumn (regardless of the migratory direction) but also in different species. However,  
383 orientation of pied flycatchers under dim yellow light differs from the typical ‘fixed  
384 direction’ response: the birds were oriented in appropriate southwesterly migratory  
385 direction (not in NW as other species do) and preferred different direction in total  
386 darkness (Fig. 1C). Orientation of pied flycatchers in total darkness seems to be ‘fixed  
387 direction’ response: they were active and headed in the northeasterly direction which  
388 is not a seasonally appropriate migratory direction in autumn for this species  
389 [53,64,71]. This suggests that the southwesterly headings under dim yellow light may  
390 represent true magnetic compass orientation but not the type of response of the birds in  
391 total darkness and dim red light.

392 2) As it has been proposed in previous studies in newts and European robins [26,39], the  
393 yellow-light magnetic orientation in pied flycatchers can be explained by the existence  
394 of a low-sensitive long-wavelength (yellow-red) mechanism along with a high-  
395 sensitive short-wavelength (UV-blue) mechanism of light-dependent  
396 magnetoreception. Although the fact that European robins have a second peak of  
397 sensitivity to monochromatic light in the red spectrum [39] has not been confirmed in  
398 an independent study [45], support the involvement of the long-wavelength mechanism  
399 in avian magnetoreception can be given by several behavioural studies. When yellow  
400 light was added to blue and green, the birds showed fixed directions towards the south  
401 under blue-and-yellow and towards the north under green-and-yellow in both spring  
402 and autumn [41]. According to the authors of this study, the cause of such unusual  
403 orientation might be a complex interaction of a short-wavelength and a long-  
404 wavelength receptors. In another study, European robins, pre-exposed to red light  
405 before tests, were oriented in a seasonal migratory direction under the same red light,  
406 in contrast to the birds pre-exposed to total darkness or full-spectrum light [42]. Results  
407 of this study indicate that the birds are able to orient under long-wavelength light but  
408 only after acclimation to specific light condition. A similar adaptation of the avian  
409 magnetic compass to new experimental condition was discovered in experiments with  
410 functional window: testing of European robins in the magnetic field weaker or stronger  
411 than the local one leads to disorientation [66]. However, after staying in the magnetic  
412 field with higher or lower intensity, birds are able to orient at the respective intensity  
413 [72,73]. Furthermore, it has been shown in neurophysiological and  
414 immunohistochemical studies that cells in the nucleus of the basal optic root and the  
415 optic tectum of homing pigeons exhibit responses to changes in the direction of the  
416 magnetic field with peaks under 503 and 582 nm light ([74], but see [51]) and

417 illumination of 590 nm yellow light leads to a stronger antiserum labelling in Cry1a  
418 than under 565 nm green light [75].

## 419 **Conclusion**

420 Many species of passerine birds are diurnal animals but migrate during the night  
421 developing nocturnal activity or restlessness (in German known as ‘Zugunruhe’; [76]) before the  
422 start of migration. However, the use of light-dependent magnetoreceptor at night faces challenges:  
423 dramatic changes in the spectral composition and intensity of light after local sunset. The spectral  
424 composition of light changes substantially during sunset and at twilight (civil, nautical, and  
425 astronomical) in the absence of artificial light pollution. After the disappearance of the sun’s disk  
426 under the horizon, red-shifted direct light and blue-shifted scattered light from the sun dominate  
427 during civil twilight [77] and then the spectrum shifts to the shorter wavelength, with an intensive  
428 blue peak [78] due to the absorption of long-wavelength light by the ozone layer (nautical twilight)  
429 [79]. At astronomical twilight, when the sun is more than 12° below the horizon and all of its signs  
430 disappear, the spectral composition depends on the presence or absence of moonlight and mostly  
431 long-wavelength. At full moon night the spectrum is close to the typical daylight spectrum ([80],  
432 see more details in [77]) and in the absence of the moon, there is the long-wavelength-shifted  
433 starlight spectrum with several peaks (at 560, 590, 630 and 684 nm [80,81]). In urban areas with  
434 light pollution, the spectral composition is similar to the light spectrum mentioned above at civil  
435 twilight, but it is strongly influenced by artificial light at nautical twilight and is fully dominated  
436 by such illumination with a broad peak centred at 590 nm starting with astronomical twilight and  
437 at night [78,80]. The intensity of light at visible wavelengths (400-700 nm) changes rapidly from  
438  $10^{18}$  quanta  $s^{-1} m^{-2}$  (photon quantity) or 1-10  $W m^{-2}$  (irradiance) at sunset to  $10^{13}$  quanta  $s^{-1} m^{-2}$  (a  
439 starlit night)/ $10^{15}$  quanta  $s^{-1} m^{-2}$  (a moonlit night) or  $10^{-4} - 10^{-5} W m^{-2}$  and lower after the end of  
440 nautical twilight ([78,80,82]; Figure 3).

441 Currently, we do not know for sure when nocturnal migratory birds select their migratory  
442 direction: at sunset and civil twilight when they usually calibrate their compass systems [53,83,84]  
443 or show non-flight activity [85] or during the whole night from sunset to sunrise. Most species  
444 begin their migratory flights in the wild or nocturnal restlessness in cages within 1–2 h after sunset,  
445 according to radiotelemetry, cage and radar studies [86–91]. Therefore, the avian magnetic  
446 compass should be adapted to different spectrum and light intensities that migratory birds face  
447 with throughout the night. And the existence of two light-dependent mechanisms which involve  
448 different cryptochromes might help them. One of the putative molecule candidates, Cry1a, is  
449 localized in the photoreceptor outer segments of the ultraviolet/violet (UV/V) cones in migratory  
450 (European robin and Eurasian blackcap) and non-migratory species (zebra finch and domestic  
451 chicken) and homing pigeon [92,93]. UV/V cones are the only cone type without oil dops that play

452 a role of spectral filters and cut off short-wavelength light [94], so Cry1a, which has been  
453 suggested to be excited by blue light to form radical pairs ([95], but see [92]) is a good candidate  
454 for a high-sensitive short-wavelength receptor in this two receptors/mechanisms model. On the  
455 other hand, Cry4, which is currently considered to be the most likely light-dependent  
456 magnetoreceptor [96], has been detected in double cones and long-wavelength single (LWS) cones  
457 [96,97]. Avian LWS and double cones contain an oil droplet that cuts off wavelength below about  
458 570 nm [94,98] required for cryptochrome photoreduction, thus Cry4 could play a role of a yellow-  
459 light sensor in the long-wavelength mechanism of avian magnetoreception.

460

#### 461 **Acknowledgements**

462 We are grateful to Julia Bojarinova and Dmitriy Sannikov for assistance in the experiments and  
463 analysis of Emlen funnels data. The authors would also like to express gratitude to Henrik  
464 Mouritsen for allowing us to use the magnetic coils belonging to his group, even though he had no  
465 role in designing and performing this study.

466

#### 467 **Authors' contributions**

468 A.P. and N.R. designed research; A.P., N.R., F.C. and G.U. constructed the temporary wooden  
469 house and experimental equipment; A.P., N.R., A.F., A.Pr. and G.U. performed experiments,  
470 collected and analysed the data; A.P. and N.R. wrote the first draft of the manuscript. All authors  
471 commented on the manuscript and gave final approval for publication.

472

#### 473 **Funding**

474 Financial support for this study was made available by the Russian Foundation for Basic Research  
475 (grant 20-04-01059 to A.P.) and Zoological Institute RAS (research project 122031100261).

476

#### 477 **Competing interests**

478 The authors declare no competing interests.

479

#### 480 **Data Availability**

481 All data generated or analysed during this study are included in this manuscript (and its  
482 Supplementary Information files) or available from the corresponding author at reasonable request.

483

#### 484 **References**

- 485 1. Mouritsen H. 2018 Long-distance navigation and magnetoreception in migratory animals.  
486 *Nature* **558**, 50–59. (doi:10.1038/s41586-018-0176-1)

- 487 2. Wiltschko R, Wiltschko W. 2019 Magnetoreception in birds. *J. R. Soc. Interface* **16**,  
488 20190295. (doi:10.1098/rsif.2019.0295)
- 489 3. Wiltschko W, Wiltschko R. 1972 Magnetic compass of European robins. *Science* (80-. ).  
490 **176**, 62–64. (doi:10.1126/science.176.4030.62)
- 491 4. Schulten K, Swenberg CE, Weller A. 1978 A Biomagnetic Sensory Mechanism Based on  
492 Magnetic Field Modulated Coherent Electron Spin Motion. *Zeitschrift für Phys. Chemie*  
493 **111**, 1–5. (doi:10.1524/zpch.1978.111.1.001)
- 494 5. Ritz T, Adem S, Schulten K. 2000 A model for photoreceptor-based magnetoreception in  
495 birds. *Biophys. J.* **78**, 707–718. (doi:10.1016/S0006-3495(00)76629-X)
- 496 6. Hore PJ, Mouritsen H. 2016 The Radical-Pair Mechanism of Magnetoreception. *Annu.*  
497 *Rev. Biophys.* **45**, 299–344. (doi:10.1146/annurev-biophys-032116-094545)
- 498 7. Timmel CR, Hore PJ. 1996 Oscillating magnetic field effects on the yields of radical pair  
499 reactions. *Chem. Phys. Lett.* **257**, 401–408. (doi:10.1016/0009-2614(96)00466-6)
- 500 8. Vácha M, Puzová T, Kvícalová M. 2009 Radio frequency magnetic fields disrupt  
501 magnetoreception in American cockroach. *J. Exp. Biol.* **212**, 3473–3477.  
502 (doi:10.1242/jeb.028670)
- 503 9. Malkemper EP, Eder SHK, Begall S, Phillips JB, Winklhofer M, Hart V, Burda H. 2015  
504 Magnetoreception in the wood mouse (*Apodemus sylvaticus*): Influence of weak  
505 frequency-modulated radio frequency fields. *Sci. Rep.* **4**, 1–6. (doi:10.1038/srep09917)
- 506 10. Ritz T, Thalau P, Phillips JB, Wiltschko R, Wiltschko W. 2004 Resonance effects indicate  
507 a radical-pair mechanism for avian magnetic compass. *Nature* **429**, 177–180.  
508 (doi:10.1038/nature02534)
- 509 11. Thalau P, Ritz T, Burda H, Wegner RE, Wiltschko R. 2006 The magnetic compass  
510 mechanisms of birds and rodents are based on different physical principles. *J. R. Soc.*  
511 *Interface* **3**, 583–7. (doi:10.1098/rsif.2006.0130)
- 512 12. Thalau P, Ritz T, Stapput K, Wiltschko R, Wiltschko W. 2005 Magnetic compass  
513 orientation of migratory birds in the presence of a 1.315 MHz oscillating field.  
514 *Naturwissenschaften* **92**, 86–90. (doi:10.1007/s00114-004-0595-8)
- 515 13. Leberecht B *et al.* 2022 Broadband 75–85 MHz radiofrequency fields disrupt magnetic  
516 compass orientation in night-migratory songbirds consistent with a flavin-based radical  
517 pair magnetoreceptor. *J. Comp. Physiol. A* (doi:10.1007/s00359-021-01537-8)
- 518 14. Pakhomov A, Chernetsov N, Bojarinova J, Cherbunin R, Kavokin K, Chetverikova R,  
519 Grigoryev PS, Lubkovskaja R, Kobylkov D. 2017 Very weak oscillating magnetic field  
520 disrupts the magnetic compass of songbird migrants. *J. R. Soc. Interface* **14**, 20170364.  
521 (doi:10.1098/rsif.2017.0364)

- 522 15. Schwarze S, Schneider N-L, Reichl T, Dreyer D, Lefeldt N, Engels S, Baker N, Hore PJ,  
523 Mouritsen H. 2016 Weak Broadband Electromagnetic Fields are More Disruptive to  
524 Magnetic Compass Orientation in a Night-Migratory Songbird (*Erithacus rubecula*) than  
525 Strong Narrow-Band Fields. *Front. Behav. Neurosci.* **10**, 1–13.  
526 (doi:10.3389/fnbeh.2016.00055)
- 527 16. Kavokin K, Chernetsov N, Pakhomov A, Bojarinova J, Kobylkov D, Namozov B. 2014  
528 Magnetic orientation of garden warblers (*Sylvia borin*) under 1.4 MHz radiofrequency  
529 magnetic field. *J. R. Soc. Interface* **11**, 20140451–20140451. (doi:10.1098/rsif.2014.0451)
- 530 17. Pinzon-Rodriguez A, Muheim R. 2017 Zebra finches have a light-dependent magnetic  
531 compass similar to migratory birds. *J. Exp. Biol.* **220**, 1202–1209.  
532 (doi:10.1242/jeb.148098)
- 533 18. Keary N, Ruploh T, Voss J, Thalau P, Wiltschko R, Wiltschko W, Bischof H-J. 2009  
534 Oscillating magnetic field disrupts magnetic orientation in Zebra finches, *Taeniopygia*  
535 *guttata*. *Front. Zool.* **6**, 1.
- 536 19. Hiscock HG, Mouritsen H, Manolopoulos DE, Hore PJ. 2017 Disruption of Magnetic  
537 Compass Orientation in Migratory Birds by Radiofrequency Electromagnetic Fields.  
538 *Biophys. J.* **113**, 1475–1484. (doi:10.1016/j.bpj.2017.07.031)
- 539 20. Kavokin K V. 2009 The puzzle of magnetic resonance effect on the magnetic compass of  
540 migratory birds. *Bioelectromagnetics* **30**, 402–410. (doi:10.1002/bem.20485)
- 541 21. Kavokin K. 2017 Can a hybrid chemical-ferromagnetic model of the avian compass  
542 explain its outstanding sensitivity to magnetic noise? *PLoS One* **12**, e0173887.
- 543 22. Bojarinova J, Kavokin K, Pakhomov A, Cherbunin R, Anashina A, Erokhina M, Ershova  
544 M, Chernetsov N. 2020 Magnetic compass of garden warblers is not affected by  
545 oscillating magnetic fields applied to their eyes. *Sci. Rep.* **10**, 3473. (doi:10.1038/s41598-  
546 020-60383-x)
- 547 23. Wiltschko W, Munro U, Ford H, Wiltschko R. 1993 Red light disrupts magnetic  
548 orientation of migratory birds. *Nature* **364**, 525–527. (doi:10.1038/364525a0)
- 549 24. Wiltschko R, Wiltschko W. 1998 Pigeon homing: Effect of various wavelengths of light  
550 during displacement. *Naturwissenschaften* **85**, 164–167. (doi:10.1007/s001140050476)
- 551 25. Phillips JB, Borland SC. 1992 Wavelength specific effects of light on magnetic compass  
552 orientation of the eastern red-spotted newt *Notophthalmus viridescens*. *Ethol. Ecol. Evol.*  
553 **4**, 33–42. (doi:10.1080/08927014.1992.9525348)
- 554 26. Phillips JB, Sayeed O. 1993 Wavelength-dependent effects of light on magnetic compass  
555 orientation in *Drosophila melanogaster*. *J. Comp. Physiol. A* **172**, 303–308.  
556 (doi:10.1007/BF00216612)



- 557 27. Guerra PA, Gegear RJ, Reppert SM. 2014 A magnetic compass aids monarch butterfly  
558 migration. *Nat. Commun.* **5**, 4164.
- 559 28. Vácha M, Soukopová H. 2004 Magnetic orientation in the mealworm beetle *Tenebrio* and  
560 the effect of light. *J. Exp. Biol.* **207**, 1241–1248. (doi:10.1242/jeb.00874)
- 561 29. Diego-Rasilla FJ, Luengo RM, Phillips JB. 2013 Use of a light-dependent magnetic  
562 compass for y-axis orientation in European common frog (*Rana temporaria*) tadpoles. *J.*  
563 *Comp. Physiol. A Neuroethol. Sensory, Neural, Behav. Physiol.* **199**, 619–628.  
564 (doi:10.1007/s00359-013-0811-0)
- 565 30. Diego-Rasilla FJ, Luengo RM, Phillips JB. 2010 Light-dependent magnetic compass in  
566 Iberian green frog tadpoles. *Naturwissenschaften* **97**, 1077–1088. (doi:10.1007/s00114-  
567 010-0730-7)
- 568 31. Wiltschko W, Wiltschko R. 1995 Migratory orientation of European Robins is affected by  
569 the wavelength of light as well as by a magnetic pulse. *J. Comp. Physiol. A* **177**, 363–369.  
570 (doi:10.1007/BF00192425)
- 571 32. Munro U, Munro JA, Phillips JB, Wiltschko W. 1997 Effect of wavelength of light and  
572 pulse magnetisation on different magnetoreception systems in a migratory bird. *Aust. J.*  
573 *Zool.* **45**, 189–198. (doi:10.1071/ZO96066)
- 574 33. Wiltschko W, Wiltschko R. 1999 The effect of yellow and blue light on magnetic  
575 compass orientation in European robins, *Erithacus rubecula*. *J. Comp. Physiol. - A*  
576 *Sensory, Neural, Behav. Physiol.* **184**, 295–299. (doi:10.1007/s003590050327)
- 577 34. Wiltschko W, Wiltschko R, Munro U. 2000 Light-dependent magnetoreception in birds:  
578 The effect of intensity of 565-nm green light. *Naturwissenschaften* **87**, 366–369.  
579 (doi:10.1007/s001140050742)
- 580 35. Rappl R, Wiltschko R, Weindler P, Berthold P, Wiltschko W. 2000 Orientation Behavior  
581 of Garden Warblers (*Sylvia borin*) under Monochromatic Light of Various Wavelengths.  
582 *Auk* **117**, 256–260.
- 583 36. Wiltschko W, Wiltschko R, Munro U. 2000 Light-Dependent Magnetoreception in Birds:  
584 Does Directional Information Change with Light Intensity? *Naturwissenschaften* **87**, 36–  
585 40. (doi:10.1007/s001140050006)
- 586 37. Wiltschko W, Gesson M, Wiltschko R. 2001 Magnetic compass orientation of European  
587 robins under 565 nm green light. *Naturwissenschaften* **88**, 387–390.  
588 (doi:10.1007/s001140100248)
- 589 38. Wiltschko W, Wiltschko R. 2001 Light-dependent magnetoreception in birds: the  
590 behaviour of European robins, *Erithacus rubecula*, under monochromatic light of various  
591 wavelengths and intensities. *J. Exp. Biol.* **204**, 3295–3302. (doi:10.1242/jeb.204.19.3295)

- 592 39. Muheim R, Bäckman J, Åkesson S. 2002 Magnetic compass orientation in European  
593 robins is dependent on both wavelength and intensity of light. *J. Exp. Biol.* **205**, 3845–  
594 3856. (doi:10.1242/jeb.205.24.3845)
- 595 40. Wiltschko W, Munro U, Ford H, Wiltschko R. 2003 Magnetic orientation in birds: Non-  
596 compass responses under monochromatic light of increased intensity. *Proc. R. Soc. B Biol.*  
597 *Sci.* **270**, 2133–2140. (doi:10.1098/rspb.2003.2476)
- 598 41. Wiltschko W, Gesson M, Stapput K, Wiltschko R. 2004 Light-dependent  
599 magnetoreception in birds: Interaction of at least two different receptors.  
600 *Naturwissenschaften* **91**, 130–134. (doi:10.1007/s00114-003-0500-x)
- 601 42. Wiltschko W, Möller A, Gesson M, Noll C, Wiltschko R. 2004 Light-dependent  
602 magnetoreception in birds: Analysis of the behaviour under red light after pre-exposure to  
603 red light. *J. Exp. Biol.* **207**, 1193–1202. (doi:10.1242/jeb.00873)
- 604 43. Wiltschko R, Stapput K, Bischof HJ, Wiltschko W. 2007 Light-dependent  
605 magnetoreception in birds: Increasing intensity of monochromatic light changes the nature  
606 of the response. *Front. Zool.* **4**, 1–12. (doi:10.1186/1742-9994-4-5)
- 607 44. Stapput K, Thalau P, Wiltschko R, Wiltschko W. 2008 Orientation of birds in total  
608 darkness. *Curr. Biol.* **18**, 602–606.
- 609 45. Wiltschko R, Munro U, Ford H, Stapput K, Wiltschko W. 2008 Light-dependent  
610 magnetoreception: Orientation behaviour of migratory birds under dim red light. *J. Exp.*  
611 *Biol.* **211**, 3344–3350. (doi:10.1242/jeb.020313)
- 612 46. Wiltschko R, Munro U, Ford H, Stapput K, Thalau P, Wiltschko W. 2014 Orientation of  
613 migratory birds under ultraviolet light. *J. Comp. Physiol. A* **200**, 399–407.  
614 (doi:10.1007/s00359-014-0898-y)
- 615 47. Wiltschko R, Gehring D, Denzau S, Nießner C, Wiltschko W. 2014 Magnetoreception in  
616 birds: II. Behavioural experiments concerning the cryptochrome cycle. *J. Exp. Biol.* **217**,  
617 4225–4228. (doi:10.1242/jeb.110981)
- 618 48. Wiltschko W, Munro U, Ford H, Wiltschko R. 2009 Avian orientation: The pulse effect is  
619 mediated by the magnetite receptors in the upper beak. *Proc. R. Soc. B Biol. Sci.* **276**,  
620 2227–2232. (doi:10.1098/rspb.2009.0050)
- 621 49. Engels S, Treiber CD, Salzer MC, Michalik A, Ushakova L, Keays DA, Mouritsen H,  
622 Heyers D. 2018 Lidocaine is a nocebo treatment for trigeminally mediated magnetic  
623 orientation in birds. *J. R. Soc. Interface* **15**. (doi:10.1098/rsif.2018.0124)
- 624 50. Phillips JB, Borland SC. 1992 Behavioural evidence for use of a light-dependent  
625 magnetoreception mechanism by a vertebrate. *Nature* **359**, 142–144.  
626 (doi:10.1038/359142a0)

- 627 51. Deutschlander ME, Phillips JB, Borland SC. 1999 The case for light-dependent magnetic  
628 orientation in animals. *J. Exp. Biol.* **202**, 891–908. (doi:10.1242/jeb.202.8.891)
- 629 52. Wiltschko R, Ahmad M, Nießner C, Gehring D, Wiltschko W. 2016 Light-dependent  
630 magnetoreception in birds: the crucial step occurs in the dark. *J. R. Soc. Interface* **13**,  
631 20151010. (doi:10.1098/rsif.2015.1010)
- 632 53. Pakhomov A, Prokshina A, Cellarius F, Mouritsen H, Chernetsov N. 2022 Access to the  
633 sky near the horizon and stars does not play a crucial role in compass calibration of  
634 European songbird migrants. *J. Exp. Biol.* **225**, jeb243631. (doi:10.1242/jeb.243631)
- 635 54. Pakhomov A, Anashina A, Chernetsov N. 2017 Further evidence of a time-independent  
636 stellar compass in a night-migrating songbird. *Behav. Ecol. Sociobiol.* **71**, 48.  
637 (doi:10.1007/s00265-017-2279-3)
- 638 55. Kishkinev D, Chernetsov N, Pakhomov A, Heyers D, Mouritsen H. 2015 Eurasian reed  
639 warblers compensate for virtual magnetic displacement. *Curr. Biol.* **25**, R822–R824.  
640 (doi:10.1016/j.cub.2015.08.012)
- 641 56. Emlen ST, Emlen JT. 1966 A Technique for Recording Migratory Orientation of Captive  
642 Birds. *Auk* **83**, 361–367. (doi:10.2307/4083048)
- 643 57. Mouritsen H, Larsen ON. 1998 Migrating young pied flycatchers *Ficedula hypoleuca* do  
644 not compensate for geographical displacements. *J. Exp. Biol.* **201**, 2927–2934.  
645 (doi:10.1242/jeb.201.21.2927)
- 646 58. Batschelet E. 1981 *Circular statistics in biology*. New York: Academic Press.
- 647 59. Fitak RR, Johnsen S. 2017 Bringing the analysis of animal orientation data full circle:  
648 model-based approaches with maximum likelihood. *J. Exp. Biol.* **220**, 3878–3882.  
649 (doi:10.1242/jeb.167056)
- 650 60. Fisher NI. 1995 *Statistical analysis of circular data*. Cambridge, UK: Cambridge  
651 University Press.
- 652 61. Alert B, Michalik A, Thiele N, Bottesch M, Mouritsen H. 2015 Re-calibration of the  
653 magnetic compass in hand-raised European robins (*Erithacus rubecula*). *Sci. Rep.* **5**,  
654 14323. (doi:10.1038/srep14323)
- 655 62. The R Core Team. 2013 *R: A Language and Environment for Statistical Computing*.  
656 Vienna, Austria: R Foundation for Statistical Computing. See  
657 <http://www.gnu.org/copyleft/gpl.html>.%0A<http://www.r-project.org/>%0A[http://www.r-](http://www.r-project.org/)  
658 [project.org](http://www.r-project.org/).
- 659 63. Bolshakov C V, Shapoval AP, Zelenova NP. 2001 Results of bird ringing by the  
660 Biological Station “Rybachy” on the Courish Spit: long-distance recoveries of birds  
661 ringed in 1956-1997. *Avian Ecol. Behav., Suppl* **2**, 1–150.

- 662 64. Zolotareva A, Utvenko G, Romanova N, Pakhomov A, Chernetsov N. 2021 Ontogeny of  
663 the star compass in birds: pied flycatchers ( *Ficedula hypoleuca*) can establish the star  
664 compass in spring . *J. Exp. Biol.* , jeb.237875. (doi:10.1242/jeb.237875)
- 665 65. Wiltschko R, Stapput K, Thalau P, Wiltschko W. 2010 Directional orientation of birds by  
666 the magnetic field under different light conditions. *J. R. Soc. Interface* **7**.  
667 (doi:10.1098/rsif.2009.0367.focus)
- 668 66. Wiltschko R, Nießner C, Wiltschko W. 2021 The Magnetic Compass of Birds: The Role  
669 of Cryptochrome. *Front. Physiol.* **12**, 1–9. (doi:10.3389/fphys.2021.667000)
- 670 67. Wang J, Du X, Pan W, Wang X, Wu W. 2015 Photoactivation of the  
671 cryptochrome/photolyase superfamily. *J. Photochem. Photobiol. C Photochem. Rev.* **22**,  
672 84–102. (doi:10.1016/j.jphotochemrev.2014.12.001)
- 673 68. Xu J *et al.* 2021 Magnetic sensitivity of cryptochrome 4 from a migratory songbird.  
674 *Nature* **594**, 535–540. (doi:10.1038/s41586-021-03618-9)
- 675 69. Muheim R, Bäckman J, Åkesson S. 2002 Magnetic compass orientation in European  
676 robins is dependent on both wavelength and intensity of light. *J. Exp. Biol.* **205**, 3845–  
677 3856. (doi:10.1242/jeb.205.24.3845)
- 678 70. Weindler P, Beck W, Liepa V, Wiltschko W. 1995 Development of migratory orientation  
679 in pied flycatchers in different magnetic inclinations. *Anim. Behav.* **49**, 227–234.  
680 (doi:10.1016/0003-3472(95)80171-5)
- 681 71. Kishkinev, D., Chernetsov, N. and Bolshakov C V. 2006 Migratory orientation of first-  
682 year pied flycatchers (*Ficedula hypoleuca*) from eastern Baltic. *Ornithologia* **33**, 153–160.
- 683 72. Wiltschko W, Stapput K, Thalau P, Wiltschko R. 2006 Avian magnetic compass: Fast  
684 adjustment to intensities outside the normal functional window. *Naturwissenschaften* **93**,  
685 300–304. (doi:10.1007/s00114-006-0102-5)
- 686 73. Winklhofer M, Dylida E, Thalau P, Wiltschko W, Wiltschko R. 2013 Avian magnetic  
687 compass can be tuned to anomalously low magnetic intensities. *Proc. R. Soc. B Biol. Sci.*  
688 **280**. (doi:10.1098/rspb.2013.0853)
- 689 74. Semm P, Demaine C. 1986 Neurophysiological properties of magnetic cells in the  
690 pigeon's visual system. *J. Comp. Physiol. A* **159**, 619–625. (doi:10.1007/BF00612035)
- 691 75. Nießner C, Denzau S, Stapput K, Ahmad M, Peichl L, Wiltschko W, Wiltschko R. 2013  
692 Magnetoreception: Activated cryptochrome 1a concurs with magnetic orientation in birds.  
693 *J. R. Soc. Interface* **10**. (doi:10.1098/rsif.2013.0638)
- 694 76. Kramer G. 1949 Über Richtungstendenzen bei der nächtlichen Zugunruhe gekäfigter  
695 Vögel. *Ornithol. als Biol. Wiss.* , 269–283.
- 696 77. Palmer G, Johnsen S. 2015 Downwelling spectral irradiance during evening twilight as a

- 697 function of the lunar phase. *Appl. Opt.* **54**, B85. (doi:10.1364/AO.54.000B85)
- 698 78. Spitschan M, Aguirre GK, Brainard DH, Sweeney AM. 2016 Variation of outdoor  
699 illumination as a function of solar elevation and light pollution. *Sci. Rep.* **6**, 26756.  
700 (doi:10.1038/srep26756)
- 701 79. Hulburt EO. 1953 Explanation of the Brightness and Color of the Sky, Particularly the  
702 Twilight Sky. *J. Opt. Soc. Am.* **43**, 113. (doi:10.1364/josa.43.000113)
- 703 80. Johnsen S, Kelber A, Warrant E, Sweeney AM, Widder EA, Lee RL, Hernández-Andrés  
704 J. 2006 Crepuscular and nocturnal illumination and its effects on color perception by the  
705 nocturnal hawkmoth *Deilephila elpenor*. *J. Exp. Biol.* **209**, 789–800.  
706 (doi:10.1242/jeb.02053)
- 707 81. Kelber A, Yovanovich C, Olsson P. 2017 Thresholds and noise limitations of colour  
708 vision in dim light. *Philos. Trans. R. Soc. B Biol. Sci.* **372**. (doi:10.1098/rstb.2016.0065)
- 709 82. Stöckl AL, Foster JJ. 2022 Night skies through animals' eyes—Quantifying night-time  
710 visual scenes and light pollution as viewed by animals. *Front. Cell. Neurosci.* **16**, 1–19.  
711 (doi:10.3389/fncel.2022.984282)
- 712 83. Cochran WW, Mouritsen H, Wikelski M. 2004 Migrating Songbirds Recalibrate Their  
713 Magnetic Compass Daily from Twilight Cues. *Science (80-. )*. **304**, 405–408.  
714 (doi:10.1126/science.1095844)
- 715 84. Muheim R, Phillips JB, Åkesson S. 2006 Polarized Light Cues Underlie Compass  
716 Calibration in Migratory Songbirds. *Science (80-. )*. **313**, 837–839.  
717 (doi:10.1126/science.1129709)
- 718 85. Pakhomov A, Chernetsov N. 2014 Early evening activity of migratory Garden Warbler  
719 *Sylvia borin*: compass calibration activity? *J. Ornithol.* **155**, 621–630.  
720 (doi:10.1007/s10336-014-1044-x)
- 721 86. Schmaljohann H, Liechti F, Bruderer B. 2007 Songbird migration across the Sahara: The  
722 non-stop hypothesis rejected! *Proc. R. Soc. B Biol. Sci.* **274**, 735–739.  
723 (doi:10.1098/rspb.2006.0011)
- 724 87. Schofield LN, Deppe JL, Diehl RH, Ward MP, Bolus RT, Zenzal TJ, Smolinsky J, Moore  
725 FR. 2018 Occurrence of quiescence in free-ranging migratory songbirds. *Behav. Ecol.*  
726 *Sociobiol.* **72**, 1–14. (doi:10.1007/s00265-018-2449-y)
- 727 88. Müller F, Eikenaar C, Crysler ZJ, Taylor PD, Schmaljohann H. 2018 Nocturnal departure  
728 timing in songbirds facing distinct migratory challenges. *J. Anim. Ecol.* **87**, 1102–1115.  
729 (doi:10.1111/1365-2656.12821)
- 730 89. Schmaljohann H, Korner-Nievergelt F, Naef-Daenzer B, Nagel R, Maggini I, Bulte M,  
731 Bairlein F. 2013 Stopover optimization in a long-distance migrant: the role of fuel load

- 732 and nocturnal take-off time in Alaskan northern wheatears (*Oenanthe oenanthe*). *Front.*  
733 *Zool.* **10**, 26. (doi:10.1186/1742-9994-10-26)
- 734 90. Åkesson S, Alerstam T, Hedenström A. 1996 Flight Initiation of Nocturnal Passerine  
735 Migrants in Relation to Celestial Orientation Conditions at Twilight. *J. Avian Biol.* **27**,  
736 95–102. (doi:10.2307/3677138)
- 737 91. Bolshakov C V, Chernetsov N, Mukhin A, Bulyuk VN, Kosarev V, Ktitorov P, Leoke D,  
738 Tsvey A. 2007 Time of nocturnal departures in European robins, *Erithacus rubecula*, in  
739 relation to celestial cues, season, stopover duration and fat stores. *Anim. Behav.* **74**, 855–  
740 865. (doi:10.1016/j.anbehav.2006.10.024)
- 741 92. Bolte P *et al.* 2021 Cryptochrome 1a localisation in light- and dark-adapted retinæ of  
742 several migratory and non-migratory bird species: no signs of light-dependent activation.  
743 *Ethol. Ecol. Evol.* **33**, 248–272. (doi:10.1080/03949370.2020.1870571)
- 744 93. Nießner C, Denzau S, Gross JC, Peichl L, Bischof HJ, Fleissner G, Wiltschko W,  
745 Wiltschko R. 2011 Avian Ultraviolet/Violet cones identified as probable  
746 magnetoreceptors. *PLoS One* **6**, 1–8. (doi:10.1371/journal.pone.0020091)
- 747 94. Stavenga DG, Wilts BD. 2014 Oil droplets of bird eyes: Microlenses acting as spectral  
748 filters. *Philos. Trans. R. Soc. B Biol. Sci.* **369**. (doi:10.1098/rstb.2013.0041)
- 749 95. Liedvogel M, Maeda K, Henbest K, Schleicher E, Simon T, Timmel CR, Hore PJ,  
750 Mouritsen H. 2007 Chemical magnetoreception: Bird cryptochrome 1a is excited by blue  
751 light and forms long-lived radical-pairs. *PLoS One* **2**, 1–7.  
752 (doi:10.1371/journal.pone.0001106)
- 753 96. Günther A, Einwich A, Sjulstok E, Feederle R, Bolte P, Koch KW, Solov'yov IA,  
754 Mouritsen H. 2018 Double-Cone Localization and Seasonal Expression Pattern Suggest a  
755 Role in Magnetoreception for European Robin Cryptochrome 4. *Curr. Biol.* **28**, 211-  
756 223.e4. (doi:10.1016/j.cub.2017.12.003)
- 757 97. Wu H, Scholten A, Einwich A, Mouritsen H, Koch KW. 2020 Protein-protein interaction  
758 of the putative magnetoreceptor cryptochrome 4 expressed in the avian retina. *Sci. Rep.*  
759 **10**, 1–13. (doi:10.1038/s41598-020-64429-y)
- 760 98. Hart NS. 2001 The visual ecology of avian photoreceptors. *Prog. Retin. Eye Res.* **20**, 675–  
761 703. (doi:10.1016/S1350-9462(01)00009-X)
- 762  
763

764 **Table 1. Light conditions in orientation cages during experiments.**

765 Light intensities are given in radiometric irradiance ( $\text{mW m}^{-2}$ ) and photon quantities ( $\text{quanta s}^{-1} \text{m}^{-2}$ ), m – monochromatic light condition.

| Monochromatic light | The peak wavelength, nm | Half bandwidth, nm | Range of half bandwidth, nm | Irradiance, $\text{mW m}^{-2}$ | Photon quantities, $\times 10^{15} \text{ quanta s}^{-1} \text{m}^{-2}$ |
|---------------------|-------------------------|--------------------|-----------------------------|--------------------------------|-------------------------------------------------------------------------|
| Green               | 530                     | 29                 | 517 - 546                   | 1                              | 2.9                                                                     |
| Yellow              | 589                     | 16                 | 580 - 596                   | 1                              | 4.2                                                                     |

767  
768  
769  
770  
771  
772  
773  
774  
775  
776  
777  
778  
779  
780  
781  
782  
783  
784  
785  
786  
787  
788  
789  
790  
791  
792  
793  
794

795 **Figure 1.** Orientation of juvenile pied flycatchers under different full-spectrum light conditions  
796 and total darkness: A) outdoor experiments without access to stars (under Plexiglass lids), 2021-  
797 2022; B) outdoor experiments with access to stars, 2021; C) indoor experiments in “total  
798 darkness”, 2022. Each dot at the circle periphery indicates the mean orientation of one individual  
799 bird; the colour dots in A indicate orientation of birds in different years: 2021 (red) and 2022  
800 (blue). The inner and outer dashed circles represent the 1 and 5 % significance levels of the  
801 Rayleigh test, respectively. Geographic (gN) and magnetic (mN) Norths correspond to 0° (local  
802 declination is 6°), and radial lines indicate the 95 % confidence intervals [CI] for the group mean  
803 orientation direction.

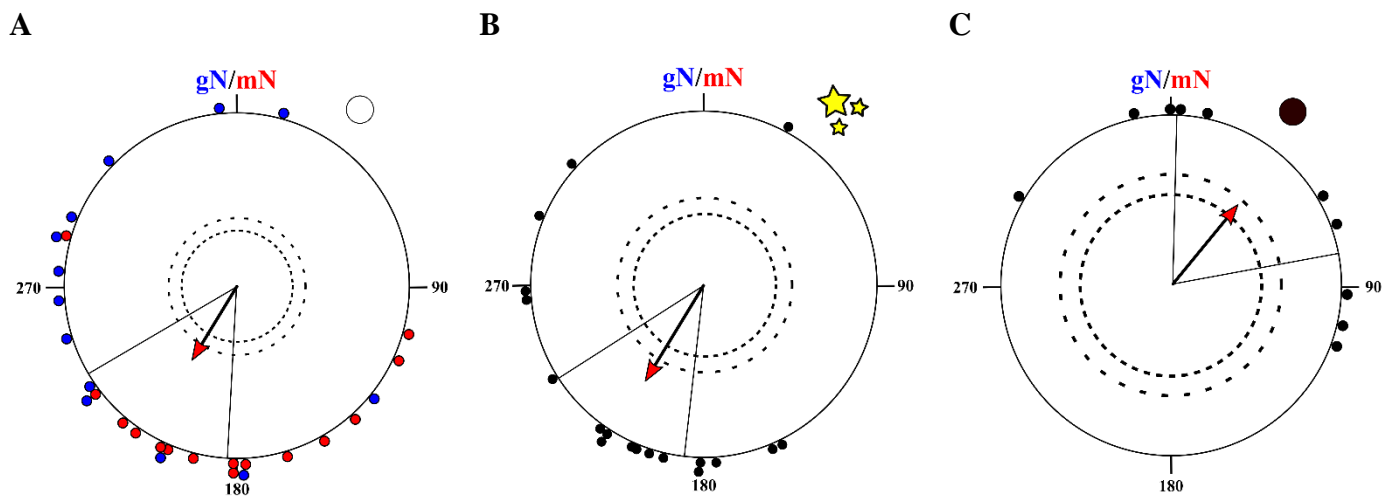

804

805

806

807

808

809

810

811

812

813

814

815

816

817

818

819



820 **Figure 2.** Orientation of juvenile pied flycatchers under different monochromatic light conditions:  
821 A) green light, the natural magnetic field (NMF), 2021; B) green light, 120° counterclockwise  
822 rotated magnetic field (120° CCW CMF), 2021; C) yellow light, the natural magnetic field (NMF),  
823 2021-2022; D) yellow light, 120° counterclockwise rotated magnetic field (120° CCW CMF),  
824 2021-2022. gN – geographic North, mN – magnetic North. For a description of the circular  
825 diagrams, see the legend of Figure 1.

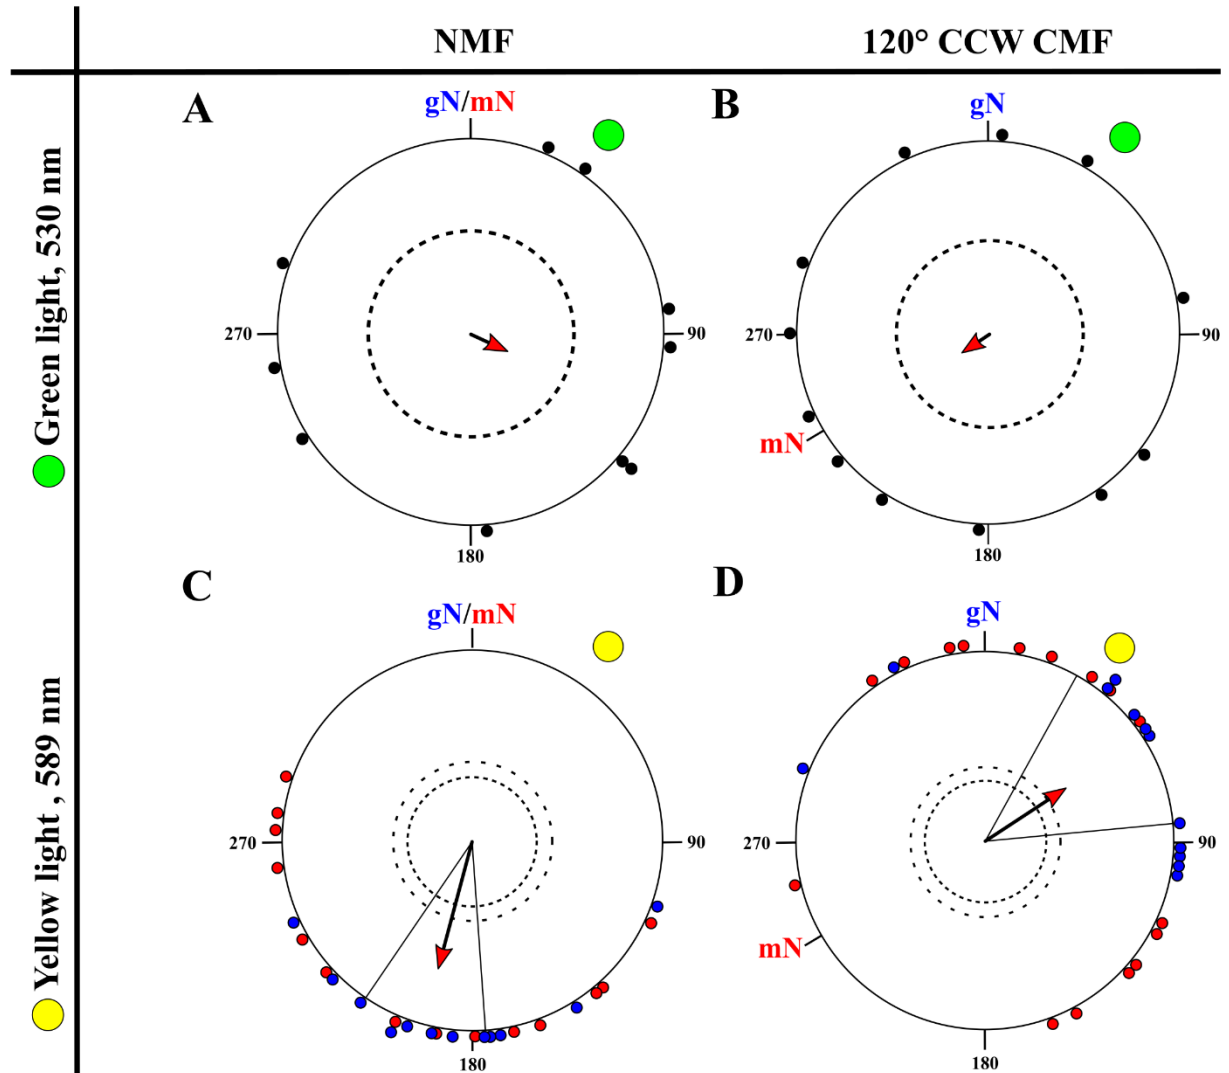

826  
827  
828  
829  
830  
831  
832  
833  
834

835 **Figure 3.** Intensity of natural light (photon quantity (A) and irradiance  $\text{mW m}^{-2}$  (B)) changes in  
836 downwelling illumination as a function of time after sunset measured at our experimental place.  
837 Green and yellow dashed lines indicate monochromatic light intensity (green and yellow) used in  
838 indoor experiments.  
839 **A**

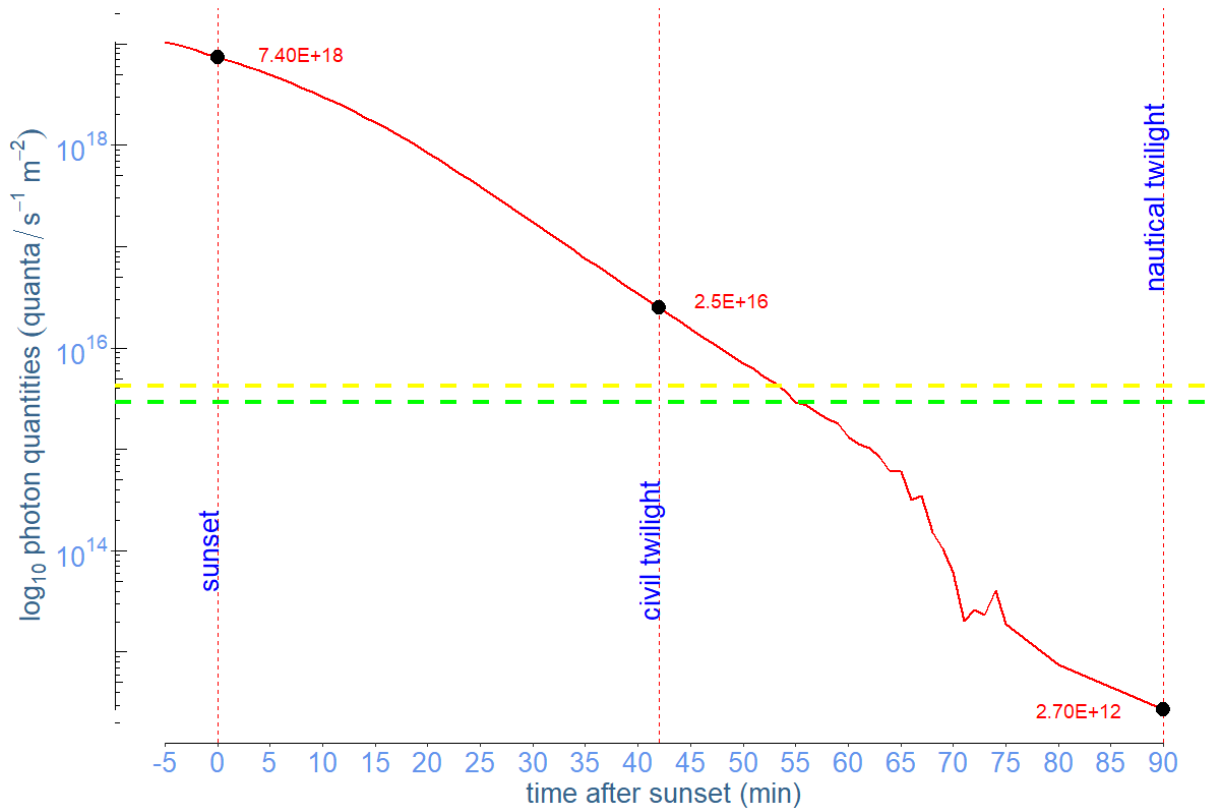

**B**

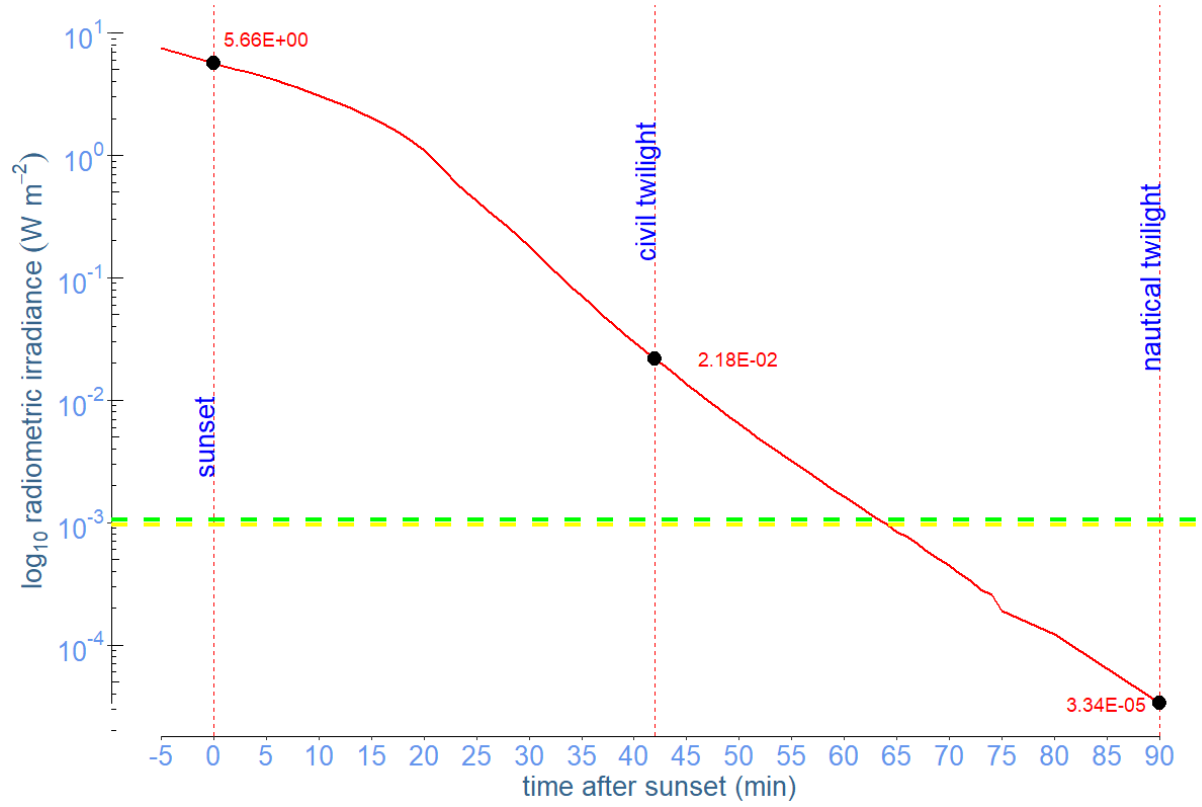

840
